Pieruzzini et al., 20201125

1 *Running title:*

2 Value of Venezuelan Olfactory test in SARS-CoV-2 infection

3

4 TYPE OF ARTICLE

5 ORIGINAL CONTRIBUTION

6

7 **What do we know about smell and taste dysfunction by SARS-CoV-2. Predictive**

8 **Value of the Venezuelan Olfactory test and RT-PCR analysis in viral infection**

9 **diagnosis**

10

11 Rosalinda Pieruzzini\*<sup>1</sup>, Carlos Ayala-Grosso\*<sup>2</sup>, Jose de Jesus Navas<sup>3</sup>, Wilneg

12 Rodríguez<sup>1</sup>, Nathalia Parra<sup>1</sup>, Emily Luque<sup>1</sup>, Aida Sánchez-Gago<sup>1</sup>, Scarleth

13 González<sup>1</sup>, Alexandra Hagobian<sup>1</sup>, Angeline Grullón<sup>1</sup>, Karen Díaz<sup>1</sup>, Mariano Morales<sup>1</sup>,

14 Melanie De Jesús<sup>1</sup>, Sonia Peña<sup>1</sup>, Luis Rodríguez<sup>1</sup>, Luis L Peña<sup>4</sup>, Ana Asaro<sup>5</sup>, Magda

15 Magris<sup>6</sup>

16

17 1. Department of Otorhinolaryngology. University Military Hospital “Dr. Carlos Arvelo”.

18 Neurorhinology Unit. San Martín- Caracas-Venezuela

19 2. Unit of Cellular Therapy, Centre of Experimental Medicine, Instituto Venezolano de Investigaciones

20 Científicas (IVIC). Caracas, Venezuela.

21 3. Direction of General Health, Fuerzas Armadas Nacional Bolivariana. Caracas-Venezuela.

22 4. Hospital “Dr. José María Vargas”. Instituto Venezolano de los Seguros Sociales. La Guaira-

23 Venezuela

24 5. University Military Hospital “Nelson Sayago Mora”. La Asuncion. Nueva Esparta-Venezuela

25 6. Ministry of Popular Power for Health. Caracas-Venezuela

26 SUMMARY

27

28 **Background:** Smell and taste disorders are reported very frequently and at an early  
29 stage in the evolution of the infectious disease caused by the SARS-CoV-2. These  
30 symptoms could be sensitive and specific to establish the condition of the infection,  
31 and may suggest the flow of decisions as to further therapy. We asked whether smell  
32 and taste impairment are earlier and more sensitive symptoms than the RT-PCR  
33 molecular assays for SARS-CoV-2 detection.

34 **Methodology:** Subjects (N=275) with a probable COVID19 diagnosis were classified  
35 as follows: Symptomatic with chemosensory dysfunction, symptomatic without  
36 chemosensory dysfunction, and asymptomatic. Subjects received a general clinical  
37 and otorhinolaryngology examination. Evaluation of the chemosensory dysfunction

Pieruzzini et al., 20201125

38 was performed by means of the Venezuelan Olfactory Test and taste test. Nasal swabs  
39 and blood samples were analyzed by real-time polymerase chain reaction analysis  
40 (RT-PCR) and a rapid diagnostic test to detect the SARS-CoV-2 virus and antiviral  
41 antibodies, respectively. Patients had access to molecular tests and smell and taste  
42 evaluations every 3 to 5 days until they recovered.

43 **Results:** Out of 44 patients that were positive for RT-PCR SARS-CoV-2: 45.83%  
44 had smell and taste disorders and COVID19 symptoms, 23.61% did not have smell or  
45 taste disorders, but had COVID19 symptoms, and 30.55% were asymptomatic. Mild  
46 hyposmia and hypogeusia account for the most frequent chemosensory disorders  
47 accompanying common SARS-CoV-2 symptoms. Time to recover from the  
48 chemosensory dysfunction ranges from 3 to 14 days, up to a maximum of 5 weeks,  
49 while RT-PCR becomes negative after 21 days and up to 35 days in some cases. The  
50 Venezuelan Olfactory Test and taste test has a 61.68% positive predictive value,  
51 45.83% sensitivity, and 68.7% specificity for SARS-CoV-2 infection.

52 **Conclusions:** Smell and taste disorders are frequent symptoms of SARS-CoV-2  
53 infection, but not a significant predictor of the disease, as compared to the molecular  
54 RT-PCR test.

55

56 *Key words: COVID19, Smell, Taste, diagnosis, RT-PCR, olfactory test*

57

58 INTRODUCTION

59 At the early stages of the SARS-CoV-2 infection, the smell and taste disorders seem  
60 to have some predictive value as to the evolution of the infection (1). Since the  
61 beginning of the pandemic, multiple studies have reported a very variable association  
62 between the smell and taste dysfunction and the presence of other symptoms that are  
63 characteristic of the coronavirus infection (1).

64 The first reports of a multicenter study that grouped clinical data from 12 hospitals, a  
65 population of 417 patients with mild to moderate COVID-19, list cough, myalgia and  
66 loss of appetite as the most common symptoms; while symptoms associated with  
67 otorhinolaryngology-related disorders were facial pain and nasal obstruction in at  
68 least 86% of the cases; and there were smell and taste disorders in 88% of the cases.  
69 The onset of the smell dysfunction was earlier than any other symptom in 11.8% of  
70 the cases (2).

71 The sudden loss of the sense of smell associated with an increasing number of cases

Pieruzzini et al., 20201125

72 of coronavirus was reported in the United Kingdom recently; however, the evidence  
73 seems to be circumstantial, because it was found as information provided in social  
74 media by subjects who had had this symptom in an isolated fashion. The authors  
75 reported 9 cases of sudden anosmia without other associated symptoms in the first 3  
76 weeks of the onset of the coronavirus. It is worth mentioning that none of these  
77 patients was evaluated with a specific test to determine the presence of the disorder  
78 (3).

79 More recently, another study carried out at Hospital L. Sacco in Milan, Italy with 59  
80 of the 88 patients of the hospital, established that 33.9% had at least one smell and/or  
81 taste disorder and 18.6% had both. In this group of patients, 20.3% had smell  
82 symptoms before they were admitted to the hospital and 13.5% during their stay (4).

83 The presence of smell alterations associated with a viral infection is not new in  
84 otorhinolaryngology; many viruses may cause olfactory dysfunction due to an  
85 inflammatory process of the nasal mucosa and the development of rhinorrhea. Among  
86 the viral agents associated with these alterations are rhinovirus, parainfluenza,  
87 Epstein-Bar, and some coronavirus (4,5). However, the fact that olfactory dysfunction  
88 associated with SARS-CoV-2 is not essentially related to the onset of rhinorrhea and  
89 nasal obstruction suggests a different action mechanism. So far, the physiopathology  
90 of smell and taste disorders in the SARS-CoV-2 infection is still under scrutiny.

91 One of the most relevant evidences of the action mechanism of coronavirus was  
92 reported as a result of an investigation of the olfactory mucosa of mice and analysis of  
93 RNA sequences of humans. It found that the 2 genes that express the information for  
94 angiotensin-converting enzyme 2 (ACE2) and the host transmembrane serine protease  
95 family member II (TMPRSS2) receptors involved in the entry of COV-2 into the cell  
96 are expressed in the cells of the respiratory epithelium of the nasal cavity, support  
97 cells, Bowman's glands, microvilli, and stem cells of the olfactory mucosa, but not in  
98 the olfactory sensory neurons. This suggests that the olfactory damage mechanism is  
99 non-neural in nature. As to the damage to the sense of taste, it appears to be directly  
100 on the taste receptor and as the result of the production of cytokines that irritate the  
101 trigeminal and glossopharyngeal nerves that transmit sensory signals to the central  
102 nervous system (6).

103 Netland et al. found that, in certain transgenic mice, there was an extensive replication  
104 of the virus in the brain, with certain regional differences, and that this brain infection,  
105 in turn, was an important factor in the aspiration pneumonia seen in some of the mice

106 studied. A generalized neuronal infection appeared after intranasal inoculation, which  
107 suggests that the entryway for the infection could be through the olfactory bulb. This  
108 raises questions about the possible effects of coronavirus on patients infected with  
109 SARS-CoV-2 in the future (7).

110 A vast majority of initial reports on smell and taste dysfunction related to coronavirus  
111 infection were based on results from patient surveys, without corroborating the  
112 diagnosis through psychophysical evaluation of chemosensory dysfunction. Patients  
113 were not followed up systematically until recovery, nor was the relationship proven  
114 by means of diagnostic tests, such as the SARS-CoV-2 RT-PCR test, or rapid  
115 diagnostic tests. These factors may have led to an overestimation of the symptom as  
116 predictive factor of the disease. Similarly, using the smell test without adjusting it to  
117 the population under analysis could result in some false positives and, consequently,  
118 an overestimation of chemosensory dysfunction diagnostics.

119 All of the above motivated us to carry out an investigation the distinctive nature and  
120 main objective of which was to determine the predictive value of smell and taste tests  
121 in the diagnosis of SARS-CoV-2 infection, and its relationship with other diagnostic  
122 tests, such as SARS-CoV-2 RT-PCR test and the rapid diagnostic test, as well as the  
123 follow up and comprehensive observation of the patient's recovery from the  
124 coronavirus infection. The objective of this study is to determine whether smell and  
125 taste disorders are an early and more sensitive biomarker than the RT-PCR test for  
126 diagnosing the SARS-CoV-2infection.

## 127 MATERIALS AND METHODS

### 128 *Population*

129 A sample of 275 individuals was selected from a population of 525 subjects examined  
130 between March and August 2020 (Table 1). The following were collected for all  
131 subjects at the beginning of the study protocol: 1. Full clinical record, including age,  
132 gender, epidemiologic background on the basis of travel and contact with positive  
133 cases, questions about suggestive respiratory signs and other symptoms, presence or  
134 not of smell and/or taste disorders. 2. General otorhinolaryngology (ORL) physical  
135 examination, Venezuelan Olfactory Test (VOT), and Basic Taste Test evaluation . 3.  
136 Nasopharyngeal swab for SARS-CoV-2 by RT-PCR molecular analysis and detection  
137 of SARS-CoV-2 antibodies by rapid diagnostic test (RDT).

138 In this study, patients were followed-up every 3 to 5 days, to verify their overall  
139 clinical condition. In addition, smell and taste tests were carried out, blood samples

Pieruzzini et al., 20201125

140 were drawn to perform RDTs, and nasopharyngeal swabs for RT-PCR tests, until they  
141 met the recovery criterion. The recovery criterion is met when one of the following  
142 conditions is fulfilled: 1.-The relative smell and taste test score is at the highest level  
143 and the RT-PCR test is negative. 2. - It has been established that there is no permanent  
144 smell or taste disorder.

#### 145 *Clinical assessment*

146 The clinical assessment of patients with probable COVID19 diagnostic followed the  
147 guideline suggested by the National Institute of Health of the United States of  
148 America (NIH-USA SARS-CoV-2 assessment guidelines). The level of organ  
149 compromise is defined as *mild or moderate* if individuals present with fever, cough,  
150 sore throat, general malaise, headache, myalgia, anosmia, ageusia, and diarrhea.  
151 When it is a *mild* condition, patients do not complain of shortness of breath, have  
152 more than 94% oxygen saturation, and there is no clinical evidence of respiratory  
153 disease, while in the *Moderate* there is clinical and imaging evidence of mild  
154 respiratory disease. The condition is defined as *Severe* in individuals with less than  
155 94% oxygen saturation and respiratory rate at 30 respirations per minute in adults, in  
156 addition to more than 50% pulmonary infiltrates or a PaO<sub>2</sub>/FIO<sub>2</sub> ratio lower than 300  
157 mmHg. In the case of *Critical* disease, there is respiratory distress which requires  
158 mechanic ventilation, as well as multiple organ failure, septic shock and vasopressor  
159 treatment.

#### 160 *Venezuelan Olfactory Test (VOT) and Taste Test*

161 The VOT is a smell test that was adapted for Venezuela from the smell identification  
162 test of the University of Pennsylvania (UPSIT) (8). The Venezuelan short test is  
163 composed of 2 notebooks with 10 odorants that are commonly recognized by  
164 Venezuelans and which were validated during a prior exploratory study (9, 10). The  
165 substances are coffee, chocolate, baby cologne, scented talc, liquid detergent, coconut  
166 essence, powdered detergent, cinnamon, acetone, and rum. Every time an odorant is  
167 examined, the subject must identify the respective smell and discriminate it among the  
168 other substances offered and mentioned in addition to the odorant he is expected to  
169 identify.

170 On the basis of identification and discrimination of odors presented to patients, the  
171 VOT provides a relative grading scale as follows: Normosmia (8-10), mild hyposmia  
172 (6-7), moderate hyposmia (5-4), severe hyposmia (2-3), and anosmia (0-1).

173 The taste test consists in recognizing the 5 universally accepted basic tastes, to wit:

Pieruzzini et al., 20201125

174 sweet, salty, sour, bitter, and umami (11). One (1) cc of a sample of each taste is  
175 placed on the anterior third of the tongue of the patient who has his eyes closed, and  
176 after 10 seconds of period, an identification of the sample may occur. If the patient  
177 cannot recognize the tastes, he is diagnosed with ageusia, and hypogeusia if the  
178 patient recognized up to 4 tastes.

179 *Rapid Diagnostic Test (RDT) to Determine Antibodies Generated to SARS-COV-2*  
180 *virus antigens*

181 Diagnostic tests N° IFU-COVID3-01 (Nhui deep blue Medical Technology co. Batch:  
182 20200307) were used to determine IgG/IgM antibodies. This kit uses a recombinant  
183 SARS-CoV-2 antigen conjugated with colloidal gold, which can interact with  
184 antibodies circulating in blood or in a serum or plasma preparation. The sample is  
185 placed on a nitrocellulose (NC) membrane that has been prepared with rat anti-IgM  
186 antibodies and human IgG antibodies, and sheep anti-rat polyclonal antibodies. When  
187 the sample diffuses in the membrane it may interact with the IgM antibodies adsorbed  
188 in it and an aggregate is produced with the coronavirus antigen marked with colloidal  
189 gold. This, in turn, is captured by the rat anti-IgM and produces a colored line. If the  
190 sample contains IgG antibodies, it forms a compound with the antigen marked with  
191 colloidal gold, this compound is captured by the rat anti-human IgG antibody and  
192 produces a colored line. When samples contain IgM and IgG at the same time, there  
193 will be 2 lines. When there are no IgM or IgG antibodies in the sample, there is only  
194 the quality control line and the result is negative.

195 *Sample Collection for RT-PCR Testing for SARS-CoV-2 detection*

196 Samples were obtained from patients by nasopharyngeal swab strictly following the  
197 biosecurity protocol. Then, they were placed in YOCON viral transport medium,  
198 batch Y25200101, and kept at a temperature between 2 and 8° C until they reached the  
199 reference laboratory. Samples collected for RT-PCR testing for SARS-CoV-2  
200 detection were processed by the Virology Service of the “Rafael Rangel” National  
201 Hygiene Institute of the Ministry of the People’s Power for Health in Caracas,  
202 Venezuela.

203 *Ethical Approval*

204 Collection and analysis of data were approved by the Bioethical committee of the  
205 “Carlos Arvelo” University Military Hospital of Caracas. All studies were conducted  
206 in compliance with the Declaration of Helsinki, and all participants signed an  
207 informed consent. The current study included participants for which there was full

208 information on multiple SARS-CoV-2 measures and key outcomes, including  
209 psychosocial factors, chronic medical conditions, and socio-demographic factors.

### 210 *Statistical Analysis*

211 Descriptive statistics was used in the analysis by age group and type of chemosensory  
212 impairment. The predictive value, sensitivity and specificity of diagnostic tests used  
213 were calculated on the basis of the Wilson score method using the OpenEpi, version 3  
214 software. Diagnostic Test Open code Calculator.

215  $\chi^2$ -Square tests were used to find the most frequent type of symptom in the SARS-  
216 CoV-2 infection. We asked whether there is a relationship between the SARS-CoV-2  
217 infection and the presence or absence of symptoms; and to evaluate the relationship  
218 among type of olfactory disorder, age and gender. In the case of the association  
219 between two variables, when the result of the  $\chi^2$ -Square test was positive, that is to  
220 say, the variables were dependent on, or associated to one another, a standardized  
221 residuals analysis was carried out. This analysis allows to determine in a significant  
222 manner which cell or frequency contributed more to the rejection of the null  
223 hypothesis in the  $\chi^2$ -Square test. Additionally, it allows to find out which cells  
224 deviated significantly from the expected value. Any deviation value higher than  $\pm 1.96$   
225 from the normal distribution is considered significant.

226 Pearson's  $\chi^2$ -Square test and Fisher's exact test were used to evaluate between-group  
227 differences in two categorical variables.

228  $\chi^2$ -Square tests and standardized residuals analyses were carried out in R with the  
229 `chisq.test` function of the `stats` package (12).

## 230 RESULTS

231 The most frequent age group among study subjects was the 25 - 38 years old, and  
232 there were more male (54.90 %) than female (45.09 %) subjects; average age of the  
233 population was  $33.63 \pm 5$  years old (Table 2). In Venezuela, the first possible SARS-  
234 CoV-2 infection cases were reported in March (Figure 1). Initially, the disease was  
235 observed in a group of 28 patients with smell and taste disorders, although only 1 of  
236 them was confirmed positive for SARS-CoV-2 by means of the RT-PCR test. Then,  
237 starting in May, the number of individuals positive for SARS-CoV-2 was increasing  
238 in parallel with the onset of smell and taste disorders; and finally, in the month of  
239 August, a significant number of patients with smell and taste disorders also tested  
240 positive for coronavirus infection by means of the RT-PCR test.

241 The observation of a higher incidence of olfactory and taste disorders together with a

242 positive molecular diagnostic suggested that the dysfunction of these senses could  
243 happen before or to a greater extent than the expression of viral genes evidenced by  
244 the RT-PCR test, and this could imply that the physiology of the chemosensory  
245 system is more susceptible to SARS-CoV-2 infection.

246 To assess this observation, molecular tests were performed on the 275 subjects who  
247 had gotten smell and taste tests. It was found that 144 subjects were RT-PCR+ for  
248 SARS-CoV-2 while 131 were RT-PCR- for SARS-CoV-2. In the RT-PCR+ group,  
249 there were more SyMVOTT+ (66/144; 45.83%) subjects than SyMVOTT- (34/144;  
250 23.61%) or ASYM (44/144; 30.55%). In contrast, among the 131 patients that tested  
251 negative for SARS-CoV-2 in the RT-PCR test, there were more SyMVOTT+ (41/131;  
252 31.30%) subjects than SyMVOTT- (27/131; 20.61%), but less than the ASYM  
253 (63/131; 48.10%) (Table 3). These results suggest that there are more individuals with  
254 olfactory and taste disorders among the COVID19 symptomatic population.

255 The higher number of RT-PCR+ patients with and without olfactory and taste  
256 disorders, and with symptoms of the infection indicates that the relative effectiveness  
257 of RT-PCR tests in confirming the COVID19 infection is 75%. In contrast, if the large  
258 number of PDR- (197/275; 71.63%) individuals in the whole sample is taken into  
259 account, the relative effectiveness of this test is 28%. (Table 3). This confirms the  
260 little reliability of PDR tests for diagnosing coronavirus infection.

261 The frequency of subjects in the SyMVOTT+, SyMVOTT- and ASYM groups as a  
262 function of the presence of chemosensory symptoms and the positive molecular test  
263 results was heterogeneous ( $X^2 = 9.19$ ,  $gl = 2$ ,  $p < 0.05$ ), which suggests that the type  
264 of symptoms and their association with chemosensory dysfunction is different in the  
265 case of SARS-CoV-2 infection. This is consistent with what was observed in the  
266 analysis of standardized residuals, since, in the SARS-CoV-2 infection, the  
267 chemosensory dysfunction is very frequent and, in this sample, very few subjects that  
268 presented with the disease were asymptomatic (Table 4.1, Figure 1). On the other  
269 hand, olfactory and taste disorders are infrequent in the general population (Tables 3  
270 and 3.1).

#### 271 *Predictive Value of VOTT*

272 When the frequency of patients with olfactory and taste disorders that were diagnosed  
273 with the VOTT was compared to the RT-PCR tests positive results, the positive  
274 predictive value of the VOTT was 61.68%, while the negative predictive value was  
275 53.57%. These results suggested that VOTT+ patients had a 0.62 probability of being



276 RT-PCR+ for SARS-CoV-2. On the other hand, the sensitivity and specificity for  
277 COVID-19 diagnosis of the Venezuelan Olfactory Test and basic taste test was  
278 45.83% and 68.7%, respectively (Table 4). These findings supported that these tests  
279 allow to detect olfactory and taste disorders in 46% of healthy individuals and in 69%  
280 of patients who were also clinically SARS-CoV-2 positive.

#### 281 *SARS-CoV-2 Affection and Chemosensory dysfunction*

282 Coronavirus infection produces different degrees of affection, as described in the  
283 methods. In this research, it was observed that 98.48 % of the 66 subjects (65/66) with  
284 chemosensory impairment (VOTT+) had mild clinical signs and 1.51% (1/66)  
285 moderate signs (Table 5).

#### 286 *Characteristics of VOTT+, SyVOTT+, and SyVOTT- Patients*

287 Clinical signs as a consequence of SARS-CoV-2 infection are quite variable. The  
288 number of SARS-CoV-2 infected patients presenting with chemosensory disorder  
289 only (VOTT+) was 18/97 (18.55%). In contrast, there were 48/97 (49.5%) SyVOTT+  
290 according to standardized residuals analysis  $P < 0.05$ ; (Table 6).

291 The group of VOTT+ patients without any other accompanying symptom (no  
292 concomitants), who referred olfactory and taste disorder as their only symptom before  
293 the molecular diagnostic and before being admitted to the hospital was 18/97  
294 (18.55%) (Table 7). When differentiated on the basis of the type of chemosensory  
295 dysfunction, 7 presented with olfactory disorder only, 4 of them anosmia, and 3 with  
296 mild hyposmia. Combined smell and taste disorders at various degrees were present in  
297 10 subjects, and only 1 had hypogeusia. All these findings suggest a disorder  
298 variability that may indicate the presence of coronavirus infection and not only the  
299 anosmia or the ageusia. In this group of patients, chemosensory disorders were an  
300 early biomarker of the coronavirus disease.

301 Chemosensory dysfunction was a symptom in 31.25% of the subjects of the  
302 SyVOTT+ group before being admitted to the hospital. In contrast, 68.75% of the  
303 patients of the sample that did not declare the disorder before being admitted to the  
304 hospital, were positive for olfactory or taste disorder when the VOT and taste test  
305 were used. This confirms the need to use a standardized objective taste for detecting  
306 the chemosensory disorder during the hospital stay. On the other hand, the onset of  
307 the chemosensory dysfunction in the SyVOTT+ group occurred between the 3<sup>rd</sup> and  
308 5<sup>th</sup> day in 70% of the cases.

Pieruzzini et al., 20201125

309 Other associated symptoms in the SyVOTT+ group vary. Among them, headache,  
310 myalgia, arthralgia, shivering,odynophagia, and hyporexia in 48% of patients; fever,  
311 headache, and general malaise in 31%, dry cough and chest pain in 8% dyspnea, and  
312 only fever or myalgia in 8% and 2%, respectively.

313 Similarly, in the SyVOTT- patients, which accounted for 32.98% of the sample, there  
314 was fever, headache, myalgia, arthralgia, and shivering in 46.87% of them; headache,  
315 arthralgia and myalgia in 15%, as well as chest pain, dyspnea in 15%, rhinorrhea,  
316 fever, nasal congestion, and dysphonia in 12.5%; and cough, general malaise, fever,  
317 and shivering in 9%. As relates the variety of symptoms in SyVOTT+ and SyVOTT-  
318 groups, no differences were observed in the frequency of presentation that would  
319 warrant an additional classification in the SARS-CoV-2 infection.

#### 320 *Age, Gender and VOTT*

321 In this study, when the presence of chemosensory dysfunction in the subjects of the  
322 sample was taken into account, the frequency was similar among them regardless  
323 gender or age (Table 7). Furthermore, smell and taste disorders combined were  
324 present in 40.90% of VOTT+ patients. The severity of the disorder is anosmia and  
325 ageusia in 30% of the cases, while mild hyposmia and hypogeusia were observed in  
326 59.25% of the cases. The olfactory disorder alone, was present as anosmia (12.12%),  
327 severe hyposmia 6.06%, mild hyposmia 25.75%, and moderate hyposmia (6.06%). It  
328 may be concluded from the analysis of the sample that the presence of both disorders  
329 is the prevailing clinical sign, and of those two, the most frequent olfactory disorder is  
330 mild hyposmia (32 patients). At the same time, anosmia was the second olfactory  
331 disorder in terms of frequency (17 patients). In contrast, hypogeusia as the only  
332 clinical sign is not frequent in coronavirus infection.

#### 333 *Time Course of SARS-CoV-2 Grading by Means of VOT*

334 The assessment of chemosensory dysfunction as a function of time by means of the  
335 Venezuela olfactory test allowed to establish a group of subjects with anosmia 11/31  
336 (35.48%) and another with mild hyposmia 15/31 (48.4%) on day 1. The number of  
337 individuals positive for mild hyposmia and normosmia in the VOT increased in  
338 frequency with time, as follows: day 5, 8/10 (80%); day 7, 17/19 (89.5%); day 10, 8/8  
339 (100%); day 14 8/10 (80%); and day 20, 15/16 (93.75%). Between day 5 and day 20,  
340 the sense of smell of 66/142 (46.47%) subjects had been restored (normosmia), as  
341 evidenced by the VOT test. The average recovery interval was 8 to 10 days, with a

342 minimum of 3 days and a maximum of 20 (Figures 2A and 2B). Only one patient did  
343 not recover the sense of smell during the time of the study.

#### 344 *Time Course of SARS-CoV-2 Grading by Means of RT-PCR Test*

345 The frequency analysis of the RT-PCR molecular test for SARS-CoV-2 was carried  
346 out for all individuals of the protocol in a systematic manner from day 1 to day 34  
347 post infection. The viral gene expression was very frequent from day 1 to day 7, as it  
348 was present in 47/78 (60.25%) subjects; it decreased between day 10 and 14, and from  
349 day 16 to day 20, when it was evident in 15/78 (19.23%) and 11/78 (14.10%)  
350 subjects, respectively. Only 3 individuals had a positive RT-PCR test result on day 26  
351 and only one did so until day 30. The frequency of VOTT+RT-PCR+ 66/275, and  
352 VOTT-RT-PCR+ 78/275 individuals is different from that of VOTT+RT-PCR-  
353 41/275, VOTT-RT-PCR- 90/275 subjects (Fisher's exact test  $P < 0.0184$ ). The  
354 frequency of RT-PCR+ molecular tests is higher between days 1 and 14 and lower  
355 between day 16 and 24. It was observed that the maximum time interval for viral gene  
356 expression was 21 days (Figure 3).

#### 357 **DISCUSSION**

358 The recent onset of this SARS-CoV-2 zoonosis in human populations has led to a  
359 significant number of studies aimed at understanding the variety of symptoms as part  
360 of the etiology of the disease. In the Venezuelan population, the time course of  
361 COVID19 has been lagging behind that of other countries, and this may have given  
362 time to establish treatment guidelines as a function of the expression of the disease.

363 This study have evaluated the predictive value of a standardized smell test for the  
364 unbiased assessment of the sense of smell and taste in individuals with respect to a  
365 molecular diagnostic of SARS-CoV-2 infection by RT-PCR test. This is an original  
366 and innovative study, as it establishes in an objective and recurrent evaluation, by  
367 means of a smell test that is standardized for Venezuela and a classical taste test, the  
368 evolution of the chemosensory disorder of subjects until the sense of smell and taste  
369 are fully restored. Additionally, the viral genes analysis by means of the SARS-CoV-2  
370 RT-PCR test and of the anti-coronavirus antibodies was carried out in symptomatic  
371 and asymptomatic patients until these had fully recovered.

372 Clinical signs vary in patients with coronavirus infection, and the severity of the  
373 disease is determined by shortness of breath, oxygen saturation, pulmonary infiltrates,  
374 multiple organ failure, septic shock, and the need to use vasopressors, as defined by  
375 the National Institute of Health of the United States of America (NIH-USA SARS-

376 CoV-2 assessment guidelines).  
377 Anosmia and ageusia were otorhinolaryngological and neurological signs of the  
378 coronavirus disease. Currently, the physiopathology of anosmia due to COVID-19 is  
379 apparently better understood; however, there is still the question why patients with  
380 moderate to severe COVID-19 infection have less olfactory affectation. Findings of  
381 this study show that 98% of patients with smell and taste disorders had mild  
382 COVID19. These results are in agreement with a recent report of self-described  
383 olfactory dysfunction in mild forms of SARS-CoV-2 infection that did not require  
384 hospitalization (13). For instance, the chemosensory dysfunction established in this  
385 study by means of self-evaluation underestimates the incidence of this symptom;  
386 therefore it would be advisable to examine whether anosmia is less prevalent in more  
387 severe forms of the infection and, consequently, the mechanism that leads to the  
388 physiopathological process that gives rise to this affectation.  
389 The definition of a mild or severe form of SARS-CoV-2 infection may imply there is  
390 an immune response with more or less contention power thus leading to a milder or  
391 more serious viral infection, respectively. This response in the entryway of the virus  
392 may also imply that the progression of the infection depends on the time taken by the  
393 virus to move towards the upper or lower airways. Therefore, it is possible that, in the  
394 mild forms of the coronavirus infection, a more intense and faster immune response  
395 will produce more local inflammation that evolves into inflammatory processes  
396 involving the neuroepithelium and olfactory bulb. In contrast, in low intensity late  
397 immune responses, patients present with mild symptoms in ears, nose and throat; but  
398 later, these could also involve higher and lower airways with respiratory compromise  
399 (14, 15).  
400 These two hypotheses have not been experimentally corroborated, because results  
401 show that patients with severe or critical forms have a higher immunoglobulin  
402 concentration in the serum and nasal secretions than patients with mild forms; which  
403 additionally makes sense, because the severe respiratory compromise has been  
404 justified as being a cytokine storm mechanism.  
405 Since the beginning of the pandemic, COVID-19 symptoms reports have been about  
406 the respiratory tract affectation, with serious and fatal complications in a certain  
407 percentage of cases. The first reports involving a nervous system affectation were  
408 associated to a sudden decrease in the sense of smell, sometimes accompanied by a  
409 decrease in the sense of taste, which patients recovered from regardless whether they

Pieruzzini et al., 20201125

410 had a positive infection outcome or not. Initial reports were based on telephone  
411 interviews or online self-assessments by means of a questionnaire. As a result, the  
412 incidence of the chemosensory disorder was 19.4% (2); 64% (16); and 85.6% (15).  
413 These findings confirmed the initial observation of Lechien et al. who were the first to  
414 mention the sudden loss of the sense of smell in SARS-CoV-2 infected patients.  
415 Subsequent reports expanded on the vision of this author and confirmed the  
416 association between the infection by this virus and the chemosensory disorder. Self-  
417 assessment of the senses of smell and taste has been proposed as an index of SARS-  
418 CoV-2 transmission that could be of value for projecting the need of hospital care  
419 units required for compromised patients (17). However, as it is commonly the case in  
420 these smell and taste self-assessment studies, sensitivity and specificity are  
421 compromised.

422 Applying standardized tests to SARS-CoV-2 infected patients has allowed to  
423 determine the level of involvement of the sensory function in the progression of the  
424 viral pathology. In a previous study, an UPSIT test for the Persian population applied  
425 to a reduced number of patients in Iran established that the olfactory disorder is  
426 variable, as there was a reduced rate of anosmic subjects (25%), while the largest  
427 percentage had moderate and severe microsmia (60%). Therefore, it was suggested  
428 that this degree of sensitivity was not enough to be able to consider the smell test as  
429 an indicator of the progression of the infection (18).

430 The senses of smell and taste form a physiological system that is affected by COVID-  
431 19; however, the degree of affectation seems to be mild. This has been shown by the  
432 studies carried out using as objective evaluator the chemosensory test of the Clinical  
433 Research Center of Connecticut, which has shown, just like Moein et al., findings,  
434 that a very small number were anosmic, while most had moderate and mild hyposmia  
435 (80%). At the same time, the taste test established that the taste affectation was mild  
436 to moderate. All patients maintained a normal degree of discrimination and a  
437 subjective overall recovery of 66%; but up to 88% presented with a certain degree of  
438 chemosensory disorder (19).

439 In contrast with these results, in this study, the results of several smell and taste tests  
440 showed the progressiveness of the disorder and time to recover from the onset of the  
441 infection. Contrary to what was seen in prior studies, in our sample, mild hyposmia  
442 and anosmia accounted for the highest share with a progressive recovery. The onset of  
443 the infection and its evolution allowed to make an evaluation until the recovery of the

444 patient.

445 Evidence of SARS-CoV-2 infection and its demonstration by virtue of new  
446 technologies have given rise to molecular tests with variable sensitivity and  
447 specificity. Findings suggesting an asymptomatic infection in significantly frequent  
448 cases of negative RT-PCR test results imply several possibilities, which include that  
449 individuals have either not been exposed to the infection or they received a reduced  
450 viral load. At the same time, the characteristics of the sample, as a result of collection,  
451 storage, preservation, and processing, could also contribute to the high number of  
452 negative results (20,21).

453 The time course of the infection, and the effectiveness of molecular tests to prove the  
454 infection, suggest an order in the events of infection progression that range from 5 to  
455 7 days for the first clinical signs to become evident. The sensitivity of the molecular  
456 diagnosis increases in a delayed manner, as a function of the increase in the  
457 concentration of viral particles that could reach a maximum level on the 7<sup>th</sup> day and  
458 up to the following 14 days, to then decrease gradually as a result of the immune  
459 response of the patient.

460 In contrast, in this study, the RT-PCR molecular test leads to suggest a minimum time  
461 of 1 day from the date of admission of the patient to the protocol and up to 14 days.  
462 This is the first study that established a multiple system for following up the  
463 progression of the chemosensory disorder and detecting the infection; be it by means  
464 of the molecular test or the SARS-CoV-2-specific antibodies detection test. The  
465 Venezuelan olfactory test is a tool that has been validated taking into consideration  
466 the characteristics of the Venezuelan population.

467 In this research, we corroborate the spontaneous recovery of most patients. Only one  
468 patient still has anosmia-type smell disorder; and in her case, other tests were carried  
469 out to establish the actual cause of such disorder. In this regard, there is similarity  
470 with what has been reported in the literature about recovery time. We did not find in  
471 our review of other investigations any relationship between the persistence of  
472 chemosensory dysfunction and the negativization of the RT-PCR test. Apparently,  
473 there is no relationship between the improvement of the disorder and the viral load  
474 detected by molecular and/or serologic tests.

475 The presence of asymptomatic SARS-CoV-2 positive patients and the fact that the  
476 predictive value of the Venezuelan olfactory test and the basic taste test does not  
477 exceed 70% may be hypothetically explained, not only by the time when the

Pieruzzini et al., 20201125

478 investigation began - which was too early with respect to the contagion peak in the  
479 country- but also by some social, demographic, and genetic characteristics of the  
480 sample studied. It could also be due to the virus mutations that affect certain  
481 populations.

482 In this regard, the SARS-CoV-2 spike mutation has been described as mediating the  
483 infection in human cells. Korber et al. listed 13 mutations that are deemed to be  
484 within a wider phylogenetic spectrum that could change with geography and with  
485 time, and which could give some populations certain selective advantages as to the  
486 transmission or resistance to the infection. In the case of Europe, the spike mutation  
487 D614G was dominant and began spreading in February 2020 and had such aggressive  
488 impact on the population. There is evidence of recombinant strains circulating locally  
489 and that are indicative of infections by multiple strains (22). This is being researched  
490 currently in Colombia and Venezuela. Rodríguez-Morales et al. (23) described 3  
491 genomic sequences of coronavirus mutations that may explain the behavior of the  
492 disease in Venezuela, in specific zones like Zulia, (where there has been significant  
493 migratory activity of people to and from Colombia and Brazil) and where the severity  
494 of the infection has been higher than in other geographic zones of the country (23).  
495 This hypothesis could explain why infections are mild or asymptomatic in some areas  
496 and severe in others, or why the penetrance of chemosensory dysfunction is lower  
497 than in other reports.

498 We may conclude that there is significant presence of smell and taste disorders, as  
499 clinical signs, in the course of the mild coronavirus disease. Therefore, every patient  
500 who presents with symptoms, must be isolated and screened for the disease by means  
501 of appropriate diagnostic tests. Patients evolve towards the resolution of smell and  
502 taste disorders spontaneously and recover in a period of time between 3 days and 5  
503 weeks, with an average of 8 to 10 days. Rapid diagnostic tests are not useful for  
504 diagnosing the coronavirus infection, but only for following it up. We would suggest  
505 including the olfactory test and taste test as part of the battery of tests complementary  
506 to the RT-PCR test for diagnosing SARS-CoV-2 and following up the progression of  
507 the disease.

#### 508 ACKNOWLEDGEMENTS

509 Authors acknowledge to Physicians José M. García, Francis Sánchez, Isabel Duque,  
510 David Forero, Ptte Margaret Tovar, and Ptte María Barico. Altogether contributed  
511 supporting organization, and care of patients. Special mention goes to following

Pieruzzini et al., 20201125

512 health Centres: Hospital Militar Universitario “Dr. Carlos Arvelo” (San Martín-  
513 Caracas), Hospital “Dr. José Ignacio Baldó” (Algodonal-Caracas), Hospital General  
514 “Dr. Jesús Yerena” (Lídice-Caracas), Hospital Oftalmológico “Dr. Francisco  
515 Riskey” (Cotiza- Caracas), Hospital de los Seguros Sociales “Dr. Miguel Pérez  
516 Carreño” (Caracas), Hospital de los Seguros Sociales “Dr. José María Vargas” (La  
517 Guaira), Hospital Militar “Nelson Sayago Mora” (La Asunción-Nueva Esparta),  
518 Hospital Militar “ Dr. Vicente Salias” (Fuerte Tiuna-Caracas), Policlínica  
519 Metropolitana (Estado Miranda), Hospital Clínico Universitario de Caracas.

520 Other case screening centers of the Health Department of the national Armed Forces  
521 located in the Great Metropolitan Area of Caracas:

522 General Command of the Army and Aviation, ‘Seguros Horizonte’ headquarters,  
523 Military Prosecution Department, TVFANB headquarters, National Armed Forces  
524 Bank head office.

525

#### 526 AUTHORSHIP CONTRIBUTION

527 R. Pieruzzini, M Magris and C Ayala-Grosso, designed and performed the research.

528 R. Pieruzzini, JJ Navas, W Rodríguez, N Parra, E Luque, A Sánchez-Gago, S

529 González, A Hagobian, A Grullón, K Díaz, M Morales, M De Jesús, S Peña, L

530 Rodríguez, LL Peña, A Asaro, M Magris, performed research, C Ayala-Grosso, A

531 Hagobian, M Magris, R Pieruzzini performed research and analyzed data; R.

532 Pieruzzini, and C Ayala-Grosso revised, analyzed, and wrote the manuscript. **R.**

533 **Pieruzzini and C Ayala-Grosso** equally contributed in analyzing data and wrote the  
534 manuscript.

#### 535 CONFLICT OF INTEREST

536 The authors of this investigation have no conflicts of interest to declare

#### 537 FUNDING

538 Resources for rapid tests and the virocult, as well as other supplies for sample

539 collection and processing, were provided by the Ministry of the People’s Power for

540 Health of Venezuela.

541 The disposable olfactory test kits were home-made and self-funded by the developers

542 of the VOT as follows: Wilneg Rodriguez, Carlos Velasquez and Rosalinda

543 Pieruzzini.

544



545 REFERENCES

546

- 547 1. Lechien JR, Chiesa-Estomba CM, De Siati DR et al. Olfactory and gustatory  
548 dysfunctions as a clinical presentation of mild-to-moderate forms of the  
549 coronavirus disease (COVID-19): a multicenter European study. *Eur Arch*  
550 *Otorhinolaryngology* 2020; 277(8):2251-2261.
- 551 2. Gane SB, Kelly C, Hopkins C. Isolated sudden onset anosmia in COVID-19  
552 infection. A novel syndrome? *Rhinology* 2020;58(3):299-301.
- 553 3. Ramanathan K, Antognini D, Combes A, et al. Planning and provision of ECMO  
554 services for severe ARDS during the COVID-19 pandemic and other outbreaks of  
555 emerging infectious diseases. *Lancet Respir Med* 2020;8(5):518-526.
- 556 4. Giacomelli A, Pagani G, Ridolfo AL, et al. Early administration of  
557 lopinavir/ritonavir plus hydroxychloroquine does not alter the clinical course of  
558 SARS-CoV-2 infection: A retrospective cohort study. *J Med Virol* 2020;  
559 10:10.1002/jmv.26407.
- 560 5. Wu YC, Chen CS, Chan YJ. The outbreak of COVID-19: An overview. *J Chin*  
561 *Med Assoc* 2020;83(3):217-220.
- 562 6. Brann DH, Tsukahara T, Weinreb C, et al. Non-neuronal expression of SARS-  
563 CoV-2 entry genes in the olfactory system suggests mechanisms underlying  
564 COVID-19-associated anosmia. *Sci Adv* 2020;6(31):eabc5801.
- 565 7. Netland J, Meyerholz DK, Moore S, et al. Severe acute respiratory syndrome  
566 coronavirus infection causes neuronal death in the absence of encephalitis in mice  
567 transgenic for human ACE2. *J Virol* 2008;82(15):7264-75.
- 568 8. Doty RL, Shaman P, Kimmelman CP, Dann MS. University of Pennsylvania  
569 Smell Identification Test: a rapid quantitative olfactory function test for the  
570 clinic. *Laryngoscope* 1984;94(2 Pt 1):176-8.
- 571 9. Pieruzzini R, Rodríguez W, Velazquez C. Short Adaptation of the smell test of  
572 the University of Pennsylvania (UPSIT) for the Venezuelan population.  
573 medRxiv: <https://medrxiv.org/cgi/content/short/2020.08.25.20182063v1>
- 574 10. Hagobian A, Pieruzzini R. Test del Olfato Hospimil vs Test de Connecticut para  
575 Diagnóstico de trastornos olfatorios. *Acta Otorrinolaringológica* 2020; 31(2):14-  
576 20.
- 577 11. Castro L, Pieruzzini R, Luque E, Garcia L. Propuesta de un Test del gusto para la  
578 población Venezolana. *Acta Otorrinolaringológica* 2020; 31 (1) :17-26.

- 579 12. Agresti, A. (2007). *An Introduction to Categorical Data Analysis*, 2nd ed. New  
580 York: John Wiley & Sons.
- 581 13. Yan CH, Faraji F, Prajapati DP, et al. Association of chemosensory dysfunction  
582 and COVID-19 in patients presenting with influenza-like symptoms. *Int Forum*  
583 *Allergy Rhinol.* 2020; 10(7):806-813.
- 584 14. Saussez S, Lechien JR, Hopkins C. Anosmia: an evolution of our understanding  
585 of its importance in COVID-19 and what questions remain to be answered. *Eur*  
586 *Arch Otorhinolaryngol.* 2020; 9:1–5.
- 587 15. Lechien JR, Chiesa-Estomba CM, De Siaty DR, et al. Olfactory and gustatory  
588 dysfunctions as a clinical presentation of mild-to-moderate forms of the  
589 coronavirus disease (COVID-19): a multicenter European study. *Eur Arch*  
590 *Otorhinolaryngol.* 2020; 277(8):2251-2261.
- 591 16. Spinato G, Fabbris C, Polesel J, et al. Alterations in Smell or Taste in Mildly  
592 Symptomatic Outpatients With SARS-CoV-2 Infection. *JAMA.* 2020;  
593 323(20):2089-2090.
- 594 17. Pierron D, Pereda-Loth V, Mantel M, et al. Smell and taste changes are early  
595 indicators of the COVID-19 pandemic and political decision effectiveness. *Nat*  
596 *Commun.* 2020;11(1):5152.
- 597 18. Moein ST, Hashemian SM, Mansourafshar B, et al. Smell dysfunction: a  
598 biomarker for COVID-19. *Int Forum Allergy Rhinol.* 2020; 10(8):944-950.
- 599 19. Vaira LA, Deiana G, Fois AG, et al. Objective evaluation of anosmia and ageusia  
600 in COVID-19 patients: Single-center experience on 72 cases. *Head Neck.* 2020;  
601 42(6):1252-1258.
- 602 20. Kubina R, Dziedzic A. Molecular and Serological Tests for COVID-19 a  
603 Comparative Review of SARS-CoV-2 Coronavirus Laboratory and Point-of-Care  
604 Diagnostics. *Diagnostics (Basel).* 2020; 10(6):434
- 605 21. Li Z, Yi Y, Luo X, Xiong N, et al. Development and clinical application of a  
606 rapid IgM-IgG combined antibody test for SARS-CoV-2 infection diagnosis. *J*  
607 *Med Virol.* 2020; 10.1002/jmv.25727.
- 608 22. Korber B, Fischer WM, Gnanakaran S, et al. COVID-19 Genomics Group,  
609 McDanal C, Perez LG, Tang H, Moon-Walker A, Whelan SP, LaBranche CC,  
610 Saphire EO, Montefiori DC. Tracking Changes in SARS-CoV-2 Spike: Evidence  
611 that D614G Increases Infectivity of the COVID-19 Virus. *Cell.* 2020; 182(4):812-  
612 827.e19.

Pieruzzini et al., 20201125

613 23. Rodriguez-Morales AJ, Balbin-Ramon GJ, Rabaan AA, et al. Genomic  
 614 Epidemiology and its importance in the study of the COVID-19 pandemic. Infez  
 615 Med. 2020; 28(2):139-142.

616 **CORRESPONDING AUTHOR**

617 **Rosalinda Pieruzzini MD**

618 **Department of otorhinolaryngology.**

619 **Unit of Neurorhinology**

620 **University Military Hospital “Dr. Carlos Arvelo”.**

621 **San Martín- Caracas-Venezuela**

622 [rosalindapieruzzini@gmail.com](mailto:rosalindapieruzzini@gmail.com)

623 **+58 424 1367083**

624

625

626

| Table 1. SARS-CoV-2 Group Definition                                                                                                                                                                                                                                                                                                                                                                                                  |                                                                                                                                                                                                                                                                                                      |                                                                                                |
|---------------------------------------------------------------------------------------------------------------------------------------------------------------------------------------------------------------------------------------------------------------------------------------------------------------------------------------------------------------------------------------------------------------------------------------|------------------------------------------------------------------------------------------------------------------------------------------------------------------------------------------------------------------------------------------------------------------------------------------------------|------------------------------------------------------------------------------------------------|
| Symptomatic with smell and taste dysfunction by VOT (SyMVOTT+)                                                                                                                                                                                                                                                                                                                                                                        | Symptomatic without smell and taste dysfunction by VOT (SyMVOTT-)                                                                                                                                                                                                                                    | Asymptomatic (ASyM)                                                                            |
| N=107                                                                                                                                                                                                                                                                                                                                                                                                                                 | N= 61                                                                                                                                                                                                                                                                                                | N=107                                                                                          |
| Subjects with general symptoms as described below: headache, cough, fever, general malaise, chest pain, dyspnea, myalgia, arthralgia, shivering, hyporexia, nausea, vomiting, diarrhea and any other symptom described in the literature that might be present and/or suggest a SARS-CoV-2 infection <b>and positive smell and taste results according to the VOT* rating and positive smell and taste results in the VOT grading</b> | Subjects with general symptoms as described below: headache, cough, fever, general malaise, chest pain, dyspnea, myalgia, arthralgia, shivering, hyporexia, nausea, vomiting, diarrhea and any other symptom described in the literature that might be present and/or suggest a SARS-CoV-2 infection | Patients who did not present with any prior symptoms or signs associated with the coronavirus. |
| VOT: Venezuelan Olfactory Test                                                                                                                                                                                                                                                                                                                                                                                                        |                                                                                                                                                                                                                                                                                                      |                                                                                                |

627

628

629

630

| Table 2. Distribution by Age and Gender |       |      |         |      |
|-----------------------------------------|-------|------|---------|------|
|                                         | Males |      | Females |      |
|                                         | 151   |      | 124     |      |
| Age Range                               | N     | %    | N       | %    |
| 18-24                                   | 27    | 9.81 | 16      | 5.81 |

Pieruzzini et al., 20201125

|       |    |       |    |       |
|-------|----|-------|----|-------|
| 25-31 | 41 | 14.90 | 32 | 11.63 |
| 32-38 | 31 | 11.27 | 28 | 10.18 |
| 39-45 | 15 | 5.45  | 19 | 6.90  |
| 46-52 | 16 | 5.81  | 9  | 3.27  |
| 53-59 | 17 | 6.18  | 10 | 3.63  |
| 60-66 | 4  | 1.45  | 10 | 3.63  |

631

632

| Table 3. PCR and PDR Testing    |               |               |           |              |               |               |           |              |
|---------------------------------|---------------|---------------|-----------|--------------|---------------|---------------|-----------|--------------|
|                                 | PCR+<br>/PDR+ | PCR+<br>/PDR- | PCR+      |              | PCR-<br>/PDR- | PCR-<br>/PDR+ | PCR-      |              |
|                                 | N=144         |               |           | %            | N=131         |               |           | %            |
| SyVOTT+                         | 16            | 50            | <b>66</b> | <b>45.83</b> | 38            | 3             | <b>41</b> | <b>31.30</b> |
| SyVOTT-                         | 14            | 20            | <b>34</b> | <b>23.61</b> | 24            | 3             | <b>27</b> | <b>20.61</b> |
| ASyM                            | 17            | 27            | <b>44</b> | <b>30.55</b> | 38            | 25            | <b>63</b> | <b>48.10</b> |
| $\chi^2=9.19, gl = 2, p < 0.05$ |               |               |           |              |               |               |           |              |

633

| Tabla 3.1 Standardized Residuals for Presence or Absence of Symptoms and SARS-CoV-2 Infection |        |        |
|-----------------------------------------------------------------------------------------------|--------|--------|
| Presence of Symptoms                                                                          | PCR+   | PCR-   |
| SyVOTT+                                                                                       | 2.56*  | -2.56* |
| SyVOTT-                                                                                       | 0.37   | -0.37  |
| ASYM                                                                                          | -2.88* | 2.88*  |
| *p < 0.05                                                                                     |        |        |

634

635

| Table 4. Predictive Value of VOT and PCR for Diagnosing SARS-CoV-2 Infection |           |           |
|------------------------------------------------------------------------------|-----------|-----------|
|                                                                              | RT-PCR+   | RT-PCR-   |
|                                                                              | N= 144    | N= 131    |
| SyVOTT+                                                                      | <b>66</b> | <b>41</b> |
| ASyM + SyVOTT-                                                               | <b>78</b> | <b>90</b> |
| $\chi^2 13.796, gl = 2, P < 0.05$                                            |           |           |

636

| Table 5. Association between Clinical Grading of SARS-CoV-2 Disease and a Positive Venezuelan Olfactory Test and Taste Test (VOTT+) |               |
|-------------------------------------------------------------------------------------------------------------------------------------|---------------|
| Clinical Grading of COVID-19 Disease                                                                                                | VOTT+ (N= 66) |
| Mild                                                                                                                                | 65 (98.48%)   |
| Moderate                                                                                                                            | 1 (1.51%)     |
| Severe                                                                                                                              | 0             |
| Critical                                                                                                                            | 0             |

637

638

639

|         | RT-PCR+   |             | Standardized Residuals |
|---------|-----------|-------------|------------------------|
|         | N= 97     | %           |                        |
| VOT+    | <b>18</b> | <b>18.6</b> | <b>-3.14*</b>          |
| SyVOTT+ | <b>48</b> | <b>43.9</b> | <b>-3.28*</b>          |
| SyVOTT- | <b>32</b> | <b>37.8</b> | <b>-0.14</b>           |

X<sup>2</sup>=13.796, gl = 2, p < 0.01. Chi Square Test X<sup>2</sup>=13.796, gl = 2, p < 0.01. \* Standardized Residuals significant values p < 0.05. It is worth mentioning that the analysis shown in this table was carried out with all the patients that had symptoms associated with COVID-19 (97/144 positive cases) excluding asymptomatic cases (44/144).

640

|                   | Males                 |       |     | Females               |       |     |
|-------------------|-----------------------|-------|-----|-----------------------|-------|-----|
|                   | Age Range (years old) |       |     | Age Range (years old) |       |     |
|                   | 18-35                 | 36-51 | >52 | 18-35                 | 36-51 | >52 |
| VOTT*             | %                     |       |     | %                     |       |     |
| Anosmic           | 0                     | 3.0   | 1.5 | 1.5                   | 3.0   | 3.0 |
| Mild Hyposmia     | 7.6                   | 1.5   | 1.5 | 7.6                   | 6.1   | 1.5 |
| Moderate Hyposmia | 3.0                   | 0     | 0   | 1.5                   | 0     | 1.5 |
| Severe Hyposmia   | 1.5                   | 0     | 0   | 1.5                   | 3.0   | 0   |
| Hypogeusia        | 6.5                   | 0     | 1.5 | 1.5                   | 0     | 0   |
| Both              | 7.6                   | 6.0   | 4.5 | 13.6                  | 3.0   | 6.1 |

VOTT\* : Venezuelan Olfactory Test and Taste Grading

641

642 **Legends**

643 Figure 1. Time course of number of cases RT-PCR+ and RT-PCR- along months of  
644 COVID19.

645 The broken line represents the patients with smell and taste disorders who were  
646 positive for COVID-19 by PCR-RT. An increase is observed since May with a  
647 maximum in July-August. The solid line represents patients with chemosensory  
648 disorders without being positive for COVID-19.

649

650 Figure 2. Olfactory impairment and evolution of SARS-CoV-2 infection. Venezuelan

Pieruzzini et al., 20201125

651 Olfactory Test was performed until Olfactory Index Grading reached normosmic  
652 value (8-10). A. Each bar represents number of subjects at specific grade of olfaction.  
653 Bar symbol represents day of testing (Day 1 -10). B. Each bar represents number of  
654 subjects at specific grade of olfaction. Bar symbol represents day of testing (Day 12 -  
655 20)

656

657 Figure 3. Evolution of RT-PCR molecular analysis under SARS-CoV-2 infection.  
658 RT-PCR molecular analysis was performed multiple times to each patient until  
659 testing become negative. Each bar represent the number of patients RT-PCR+  
660 (black) and RT-PCR- (white) through time (days of PCR testing).

661

662

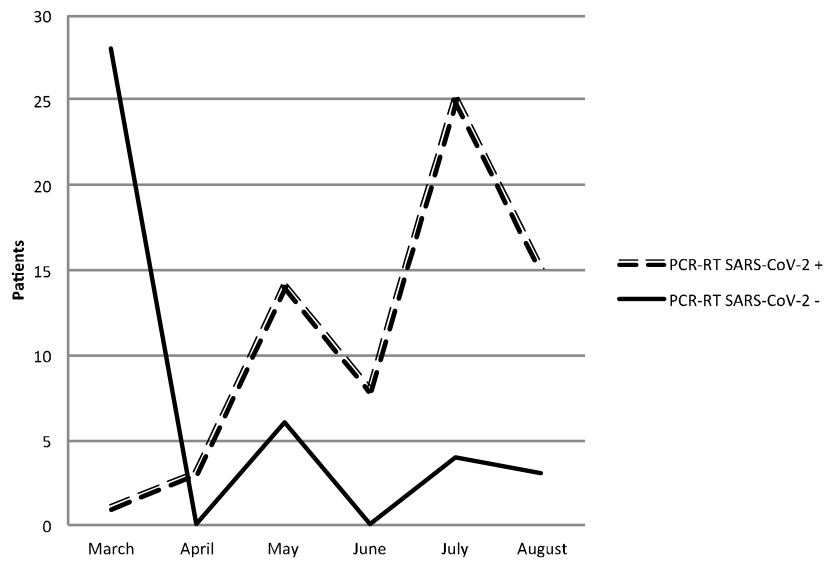

Figure 1

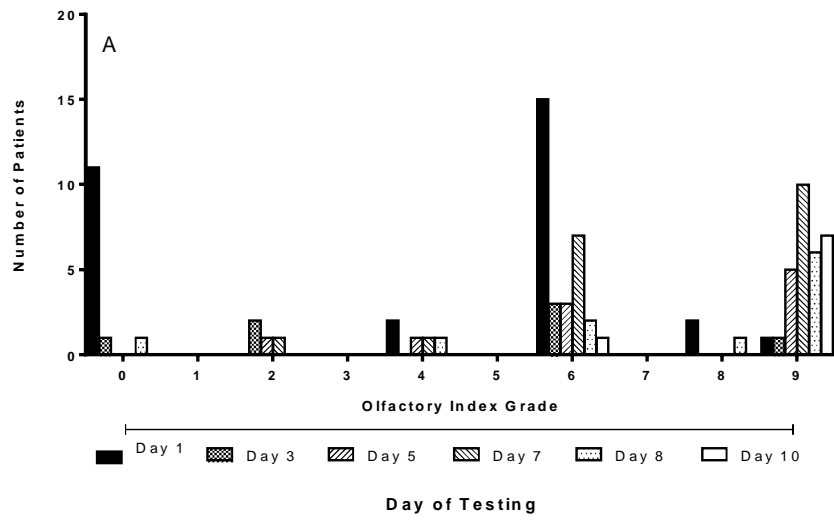

Figure 2



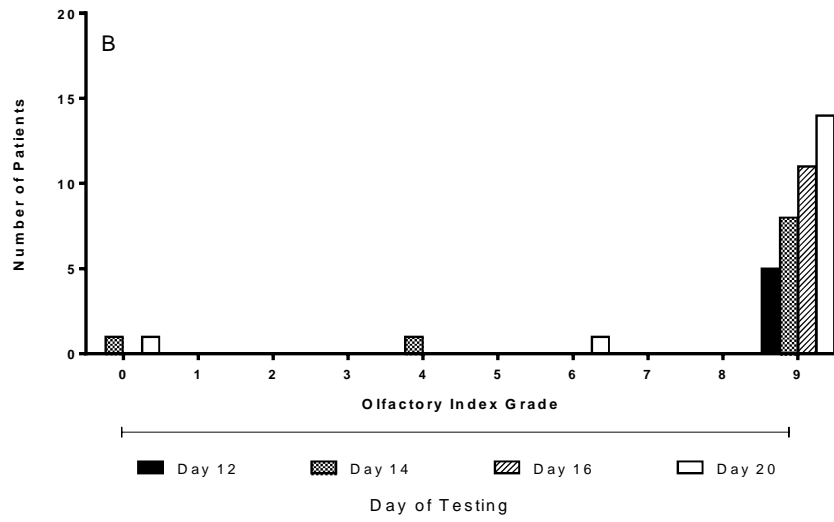

Figure 3A

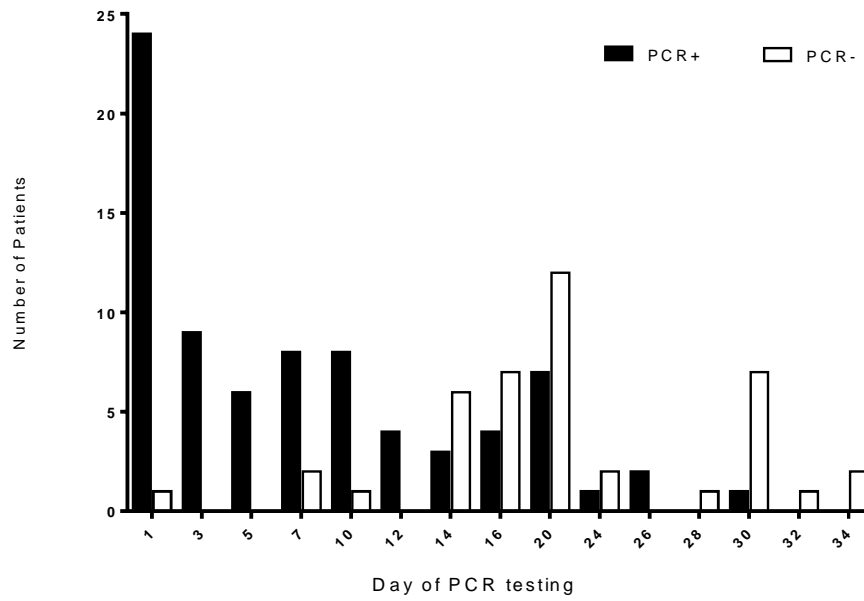

Figure 3B
